# Supplementary material for: Phenolic and Anthocyanin Compounds and Antioxidant Activity of Tamarillo (Solanum betaceum Cav.)
Source: PubMed Central journal article supplement (PMC7070485; doi:10.3390/antiox9020169), 2020-02-18
Supplement: antioxidants-09-00169-s001.pdf [file antioxidants-09-00169-s001.pdf]

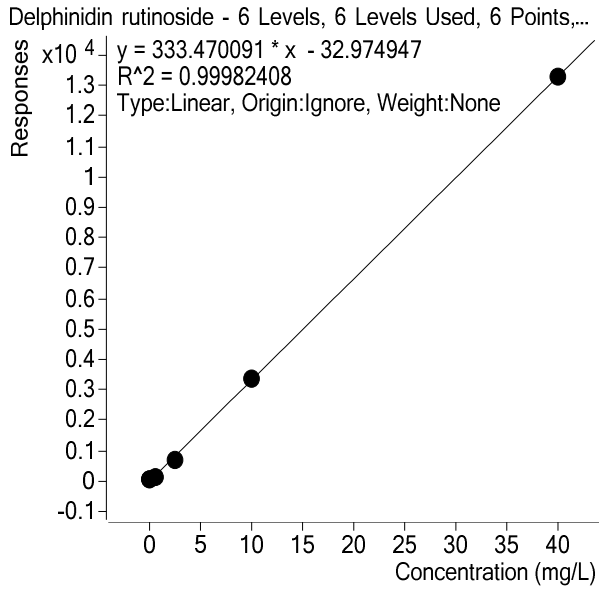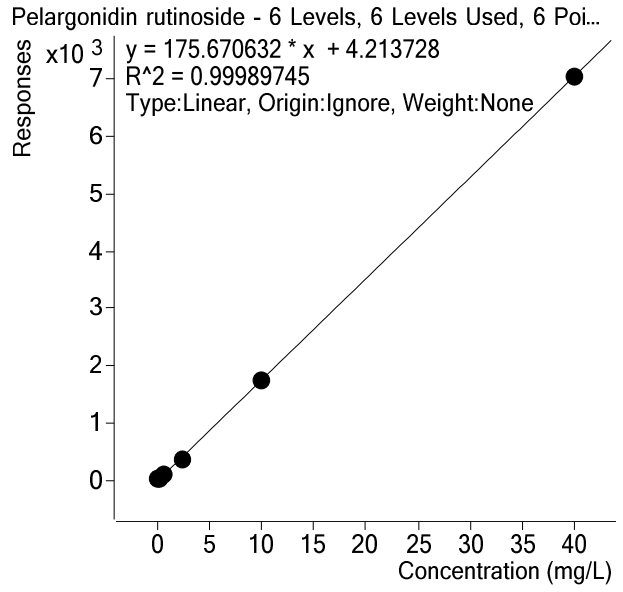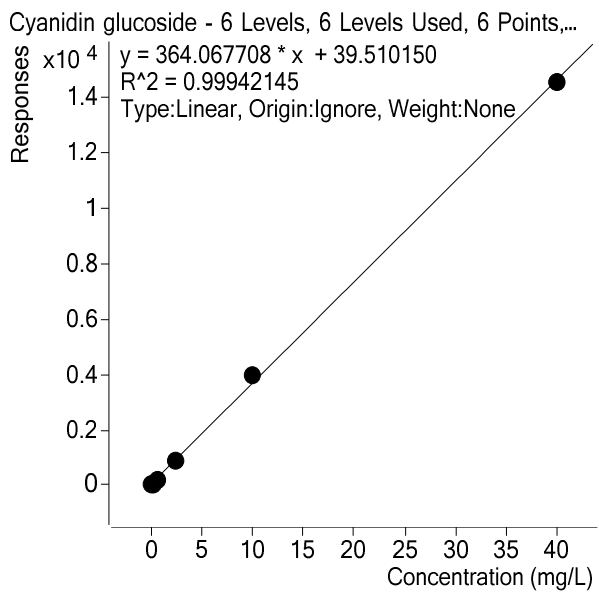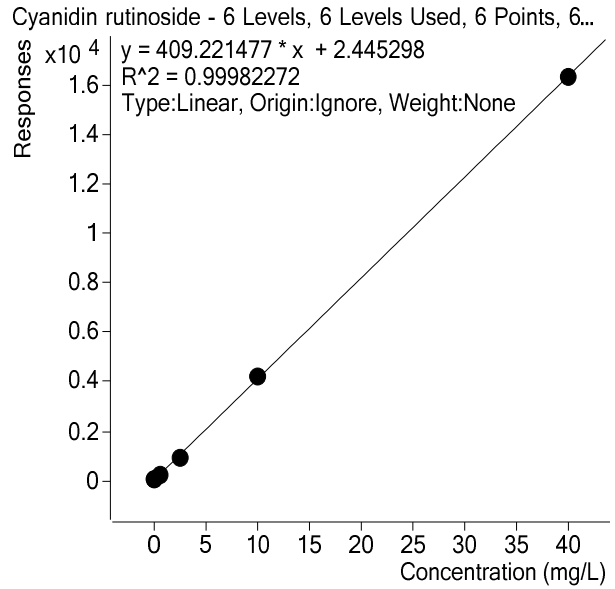

**Figure S1.** Standard curves of four anthocyanins detected in tamarillo using Agilent Chemstation Software (Agilent Technologies, Australia) for LC-MS

**Table S1.** Method validation for quantification of polyphenols and anthocyanins present in tamarillos.

| Analytes                | RT<br>(min) | Precursor<br>ion ( <i>m/z</i> ) | Product<br>ion ( <i>m/z</i> ) | Collision<br>energy<br>(V) | Regression equation       | Linear fit<br>correlation<br>coefficient <sup>2</sup> | Calibration<br>range (mg.L <sup>-1</sup> ) | Limit of<br>detection<br>(µg.L <sup>-1</sup> ) | Limit of<br>quantification<br>(µg.L <sup>-1</sup> ) | Ion mode |
|-------------------------|-------------|---------------------------------|-------------------------------|----------------------------|---------------------------|-------------------------------------------------------|--------------------------------------------|------------------------------------------------|-----------------------------------------------------|----------|
| <i>Polyphenols</i>      |             |                                 |                               |                            |                           |                                                       |                                            |                                                |                                                     |          |
| Chlorogenic acid        | 8.908       | 353.0                           | 191.0                         | 13                         | $y = 9149.52x - 1284.97$  | 0.9971                                                | 0.0977 – 6.25                              | 0.1920                                         | 0.5817                                              | Negative |
| Caffeic acid            | 9.381       | 179.0                           | 135.0                         | 13                         | $y = 14247.18x - 5425.88$ | 0.9994                                                | 0.0879 – 11.25                             | 0.0419                                         | 0.1270                                              | Negative |
| <i>p</i> -coumaric acid | 11.651      | 163.0                           | 119.0                         | 12                         | $y = 2839.08x + 114.77$   | 0.9992                                                | 0.0586 – 7.5                               | 0.0911                                         | 0.2761                                              | Negative |
| Ferulic acid            | 12.827      | 193.0                           | 134.0                         | 12                         | $y = 822.08x + 37.54$     | 0.9999                                                | 0.1074 – 13.75                             | 0.1878                                         | 0.5692                                              | Negative |
| Gallic acid             | 2.089       | 169.0                           | 125.0                         | 10                         | $y = 37448.95x + 1792.43$ | 0.9964                                                | 0.0488 – 6.25                              | 0.2980                                         | 0.9030                                              | Negative |
| Ellagic acid            | 13.557      | 301.0                           | 145.0                         | 36                         | $y = 787.13x - 24.83$     | 0.9992                                                | 0.0732 – 9.375                             | 1.7155                                         | 5.1984                                              | Negative |
| Kaempferol              | 17.228      | 285.0                           | 239.0                         | 24                         | $y = 380.98x - 80.54$     | 0.9993                                                | 0.0586 – 7.5                               | 0.8451                                         | 2.5610                                              | Negative |
| Catechin                | 9.020       | 289.0                           | 245.0                         | 6                          | $y = 7589.21x - 1046.10$  | 0.9985                                                | 0.4883 – 31.25                             | 0.6137                                         | 1.8598                                              | Negative |
| Epicatechin             | 10.870      | 289.0                           | 245.0                         | 8                          | $y = 8305.81x - 5475.92$  | 0.9937                                                | 0.2441 – 15.625                            | 0.7679                                         | 2.3270                                              | Negative |
| Rutin                   | 13.622      | 609.0                           | 300.0                         | 40                         | $y = 23979.25x - 1254.12$ | 0.9992                                                | 0.0488 – 6.25                              | 0.0092                                         | 0.0279                                              | Negative |
| Kaempferol rutinoside   | 14.852      | 593.0                           | 285.0                         | 30                         | $y = 10917.23x - 340.32$  | 0.9984                                                | 0.0488 – 6.25                              | 0.0287                                         | 0.0869                                              | Negative |
| Isorhamnetin rutinoside | 15.096      | 623.0                           | 315.0                         | 28                         | $y = 8272.36x - 297.53$   | 0.9991                                                | 0.0488 – 6.25                              | 0.0408                                         | 0.1237                                              | Negative |
| <i>Anthocyanins</i>     |             |                                 |                               |                            |                           |                                                       |                                            |                                                |                                                     |          |
| Delphinidin rutinoside  | 4.890       | 609.1                           | 300.1                         | 33                         | $y = 333.47x - 32.98$     | 0.9998                                                | 0.0391 – 40.0                              | 2.3044                                         | 6.9831                                              | Negative |
| Cyanidin glucoside      | 5.064       | 447.1                           | 284.1                         | 21                         | $y = 364.07x + 39.51$     | 0.9994                                                | 0.0391 – 40.0                              | 3.8123                                         | 11.5523                                             | Negative |
| Cyanidin rutinoside     | 5.396       | 593.2                           | 284.1                         | 33                         | $y = 409.22x + 2.45$      | 0.9998                                                | 0.0391 – 40.0                              | 1.8851                                         | 5.7124                                              | Negative |
| Pelargonidin rutinoside | 5.848       | 577.2                           | 269.1                         | 25                         | $y = 175.67x + 4.21$      | 0.9999                                                | 0.0391 – 40.0                              | 3.3400                                         | 10.1212                                             | Negative |

RT: retention time (minute)

*m/z*: mass-to-charge ratio
